# Supplementary material for: Hollow mesoporous silica supported PtIr bimetal catalysts for selective hydrogenation of phenol: significant promotion effect of iridium
Source: Royal Society of Chemistry journal article supplement (doi:10.1039/c7ra05653b), 2017-01-01
Supplement: c7ra05653b1.pdf [file c7ra05653b1.pdf]

## Electronic Supplementary Information (ESI)

Hollow mesoporous silica supported PtIr bimetal catalysts for selective hydrogenation of phenol: significant promotion effect of Iridium

Yuying Zheng<sup>a</sup>, Peishan He<sup>a</sup>, Yanxiong Fang<sup>a</sup>, Xu Yang<sup>b\*</sup>, Huagen Liang<sup>c\*</sup>

### 1. Figures and schemes

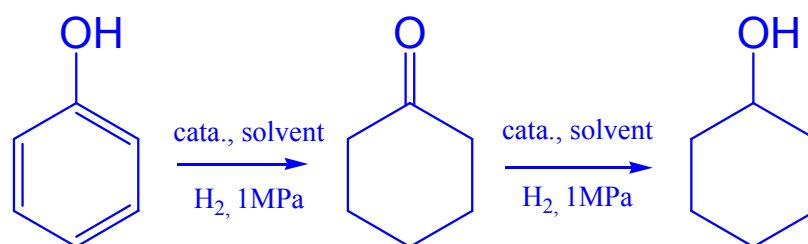

**Scheme S1 Reaction pathway of phenol hydrogenation.** Firstly, the partial phenol hydrogenation yields cyclohexanone, and then goes through deep hydrogenation to the cyclohexanol.

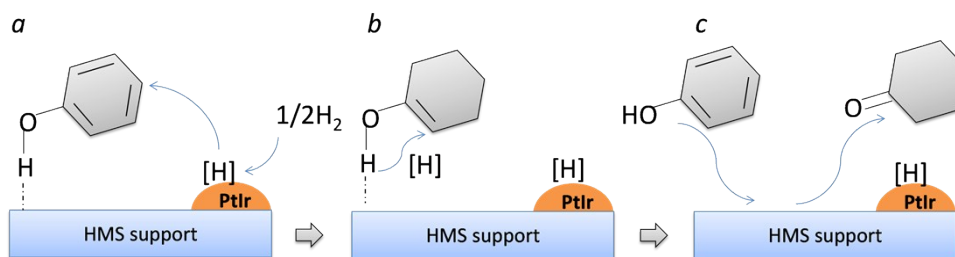

**Scheme S2 Possible Reaction Mechanism of Phenol over PtIr/HMS.** Firstly, the phenol is easily absorbed on the surface of the catalyst, and  $H_2$  is dissociated into active hydrogen, denoted as  $[H]$ , on the surface of PtIr (step a). The phenol is then partially hydrogenated with  $[H]$  to form the enol (step b), which can isomerize rapidly to give cyclohexanone [1]. Finally the cyclohexanone leaves the surface of the catalyst, being replaced by new phenol molecule (step c), or proceeds further hydrogenation to cyclohexanol [2] (not shown for brevity).

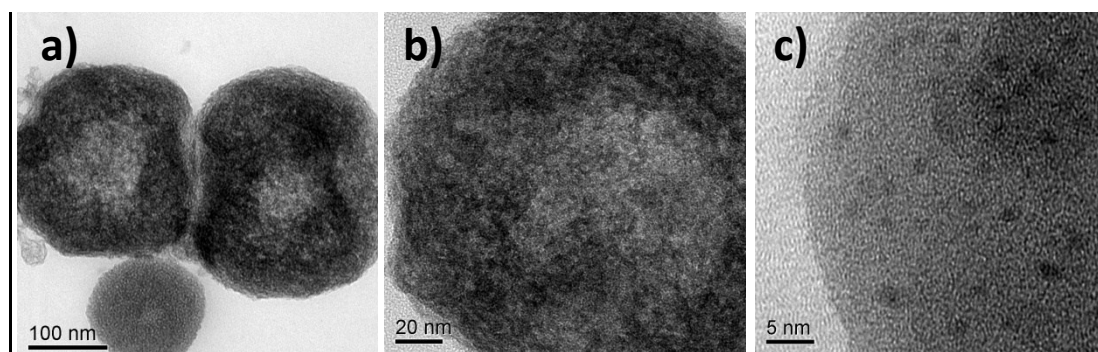

**Fig. S1 TEM images of PtIr0.1/HMS after hydrogenation.** It showed negligible metal sintering for the PtIr0.1/HMS, demonstrating the good stability of catalyst.

#### Reference

- 1 Y. Wang, J. Yao, H. Li and et al, *J. Am. Chem. Soc.*, 2011, 133, 2362
- 2 M. Chatterjee, H. Kawanami, M. Sato and et al, *Adv. Synth. Catal.*, 2009, 351: 1912
